# Supplementary material
Source: publisher figshare collection journal article supplement (https://springernature.figshare.com/ndownloader/files/20029463)
Supplement: Supplementary file 1 [file 20029463]

Figure S1 . Colony and micromorphology of actinobacterial strain TN10


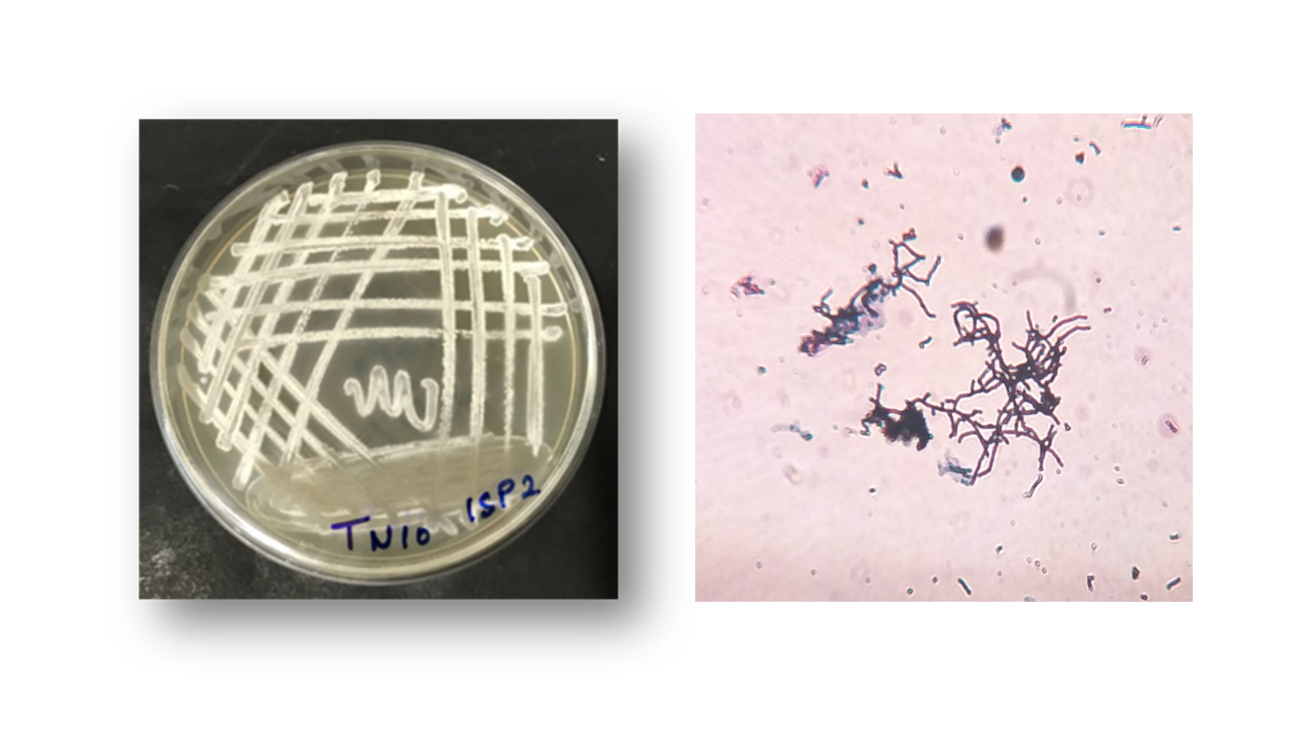


**Table S1. Physiological characteristics of potential actinobacterial strain TN10**

| **Factors** | **Variables** | **Growth** |
| --- | --- | --- |
| **Sugars** | Glucose | Good |
|  | Arabinose | Good |
|  | Sucrose | Poor |
| Xylose | Good |
| Inositol | Good |
| Mannitol | Good |
| Fructose | Good |
| Rhamnose | Good |
| Raffinose | Poor |
| Cellulose | No Growth |
| **Amino acid** | Asparagine | Good |
| Glutamine | Good |
| Lipase | Good |
| **pH** | 5 | No Growth |
| 7 | Good |
| 9 | Good |
| 11 | Moderate |
| **Temperature (ºC)** | 20 | Moderate |
| 30 | Good |
| 40 | Moderate |
| 50 | No Growth |
| **NaCl %** | 0 | Good |
| 1 | Good |
| 2.5 | Good |
| 5 | Moderate |
| 7.5 | Poor |
| 10 | No Growth |
